# Supplementary material for: Novel MECP2 gene therapy is effective in a multicenter study using two mouse models of Rett syndrome and is safe in non-human primates
Source: PubMed Central journal article supplement — Mol Ther. 2023 Jul 22;31(9):2767–82. doi: 10.1016/j.ymthe.2023.07.013 (PMC10492029; doi:10.1016/j.ymthe.2023.07.013), 2023-07-22
Supplement: mmc1.pdf [file mmc1.pdf]

## **Supplemental Information**

### **Novel MECP2 gene therapy is effective in a multicenter study using two mouse models of Rett syndrome and is safe in non-human primates**

**Samantha Powers, Shibi Likhite, Kamal K. Gadalla, Carlos J. Miranda, Amy J. Hufenberger, Cassandra Dennys, Kevin D. Foust, Pablo Morales, Christopher R. Pierson, Federica Rinaldi, Stephanie Perry, Brad Bolon, Nicolas Wein, Stuart Cobb, Brian K. Kaspar, and Kathrin C. Meyer**

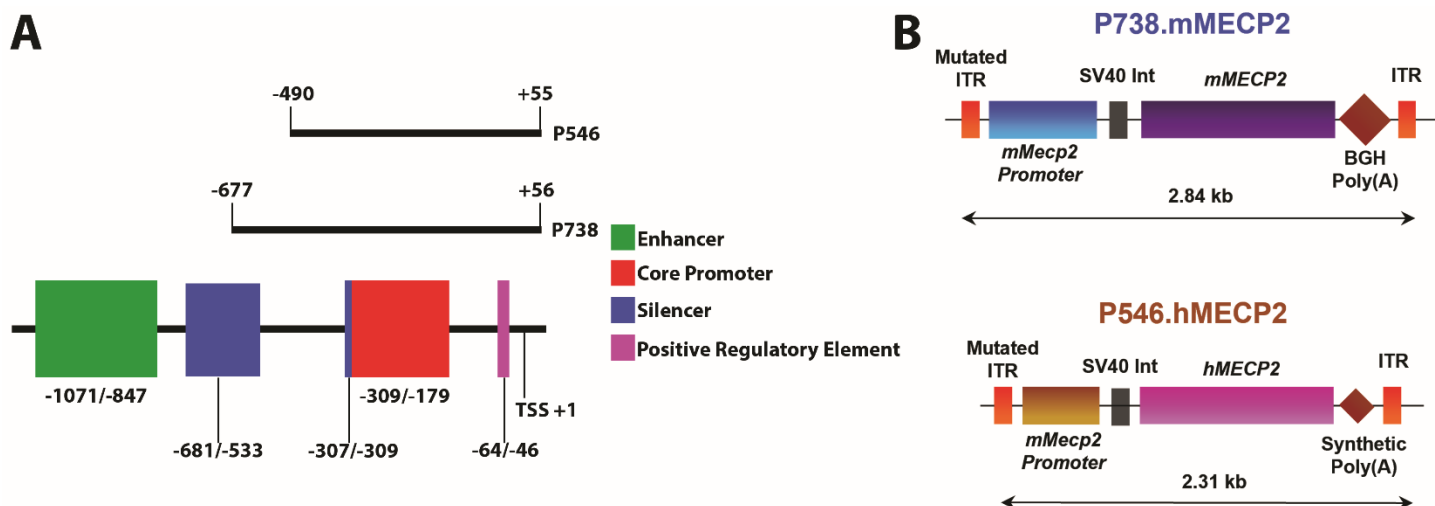

**Fig. S1: Schematic of the P546 and P738 Promoters and Vector Constructs.** (A) Schematic shows representative drawing of the P546 and P738 promoters relative to the annotated *Mecp2* mouse promoter region. (B) Representative drawing of the P738.mMECP2 vector from Garg *et al*, 2013 and the P546.hMECP2 vector used in the current study.

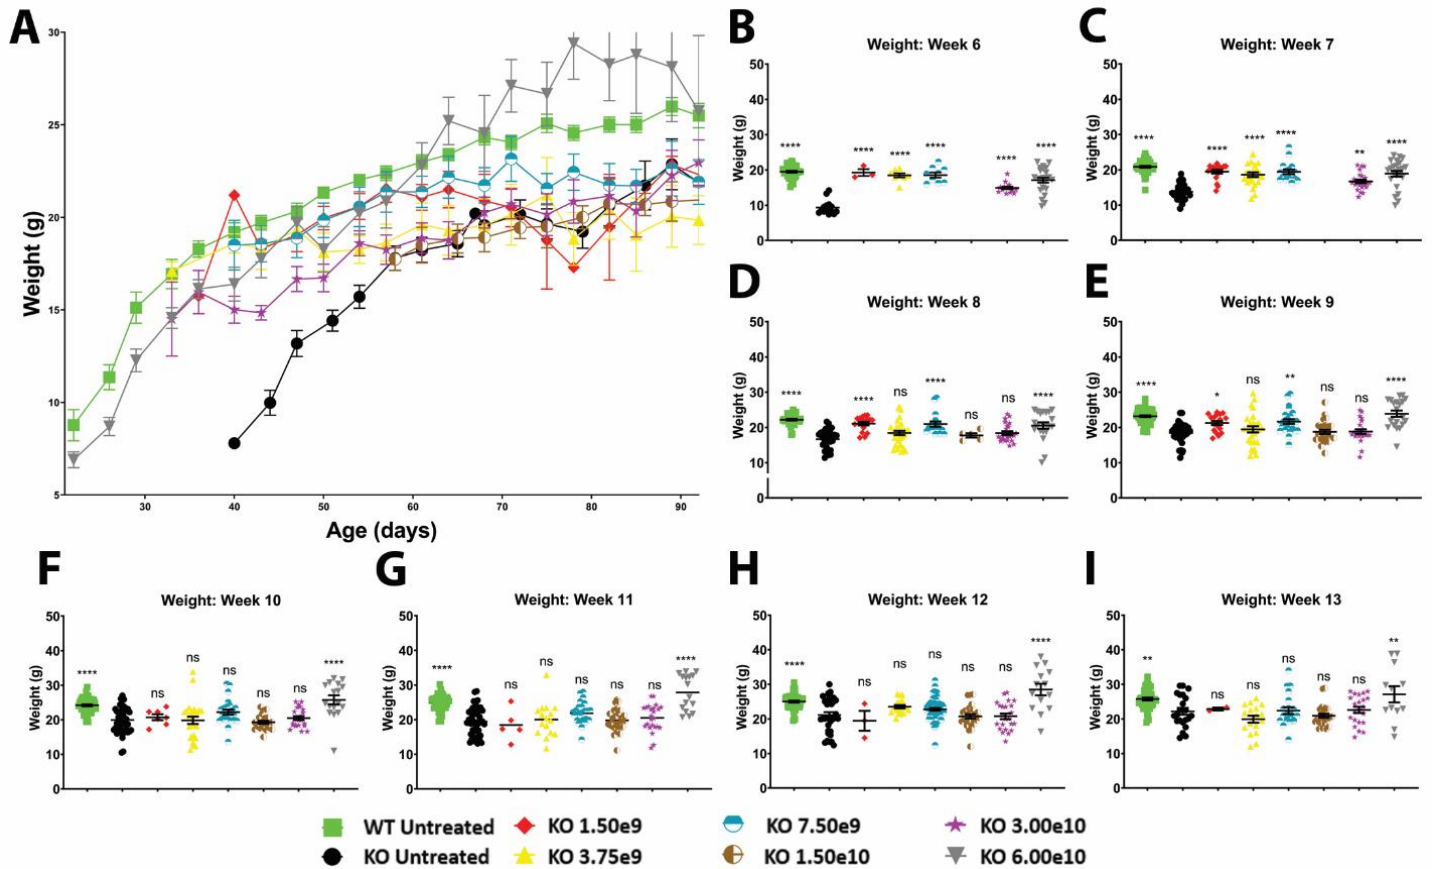

**Fig. S2: scAAV9.P546.MECP2 Treatment Improves KO Weight During Early Disease Course.**

(A) Weight is plotted for untreated WT, untreated KO and vector treated KO mice with a table showing the decreasing difference in weight between untreated WT and KO mice between week 6-13. (B-I) Average weight per treatment group is shown in for week 6-13. (B) Week 6: all vector treated KO groups have significantly higher weight than untreated KO mice ( $p < 0.0001$ ). (C) Week 7: All vector treated KO groups have significantly higher weight than untreated KO mice ( $p < 0.0001$  for all except  $3.00 \times 10^{10}$ ,  $p = 0.0036$ ). (D) Week 8: half of the vector treated KO groups have significantly higher weight than untreated KO mice (untreated WT,  $p < 0.0001$ ;  $1.50 \times 10^9$ ,  $7.50 \times 10^9$ ,  $6.00 \times 10^{10}$ ,  $p < 0.0001$ ;  $3.75 \times 10^9$ ,  $p = 0.2121$ ;  $1.5 \times 10^{10}$ ,  $p = 0.9998$ ;  $3.00 \times 10^{10}$ ,  $p = 0.3615$ ). (E) Week 9: half of the vector treated KO groups have significantly higher weight than untreated KO mice (untreated WT,  $p < 0.0001$ ;  $1.50 \times 10^9$ ,  $p = 0.0282$ ;  $3.75 \times 10^9$ ,  $p = 0.9745$ ;  $7.50 \times 10^9$ ,  $p = 0.0008$ ;  $1.5 \times 10^{10}$ ,  $p > 0.9999$ ;  $3.00 \times 10^{10}$ ,  $p > 0.9999$ ;  $6.00 \times 10^{10}$ ,  $p < 0.0001$ ). (F) Week 10: KO mice treated with the highest dose of vector had significantly higher weight than untreated KO mice (untreated WT,  $p < 0.0001$ ;  $1.50 \times 10^9$ ,  $p > 0.9999$ ;  $3.75 \times 10^9$ ,  $p > 0.9999$ ;  $7.50 \times 10^9$ ,  $p = 0.1470$ ;  $1.5 \times 10^{10}$ ,  $p > 0.9999$ ;  $3.00 \times 10^{10}$ ,  $p > 0.9999$ ;  $6.00 \times 10^{10}$ ,  $p < 0.0001$ ). (G) Week 11: KO mice treated with the highest dose of vector had significantly higher weight than untreated KO mice (untreated WT,  $p < 0.0001$ ;  $1.50 \times 10^9$ ,  $p > 0.9999$ ;  $3.75 \times 10^9$ ,  $p > 0.9999$ ;  $7.50 \times 10^9$ ,  $p = 0.0951$ ;  $1.5 \times 10^{10}$ ,

$p > 0.9999$ ;  $3.00 \times 10^{10}$ ,  $p = 0.9866$ ;  $6.00 \times 10^{10}$ ,  $p < 0.0001$ ). (H) Week 12: KO mice treated with the highest dose of vector had significantly higher weight than untreated KO mice (untreated WT,  $p < 0.0001$ ;  $1.50 \times 10^9$ ,  $p > 0.9999$ ;  $3.75 \times 10^9$ ,  $p > 0.4738$ ;  $7.50 \times 10^9$ ,  $p = 0.5593$ ;  $1.5 \times 10^{10}$ ,  $p > 0.9999$ ;  $3.00 \times 10^{10}$ ,  $p > 0.9999$ ;  $6.00 \times 10^{10}$ ,  $p = 0.0068$ ). (I) Week 13: KO mice treated with the highest dose of vector had significantly higher weight than untreated KO mice (untreated WT,  $p = 0.0050$ ;  $1.50 \times 10^9$ ,  $p > 0.9999$ ;  $3.75 \times 10^9$ ,  $p > 0.7524$ ;  $7.50 \times 10^9$ ,  $p > 0.9999$ ;  $1.5 \times 10^{10}$ ,  $p > 0.9918$ ;  $3.00 \times 10^{10}$ ,  $p > 0.9999$ ;  $6.00 \times 10^{10}$ ,  $p = 0.0068$ ). Statistics applied show the mean of each group compared with the mean of untreated KO via ANOVA with Tukey's honest significance post hoc test. Weights of  $1.5 \times 10^{10}$ vg were not recorded prior to week 8.

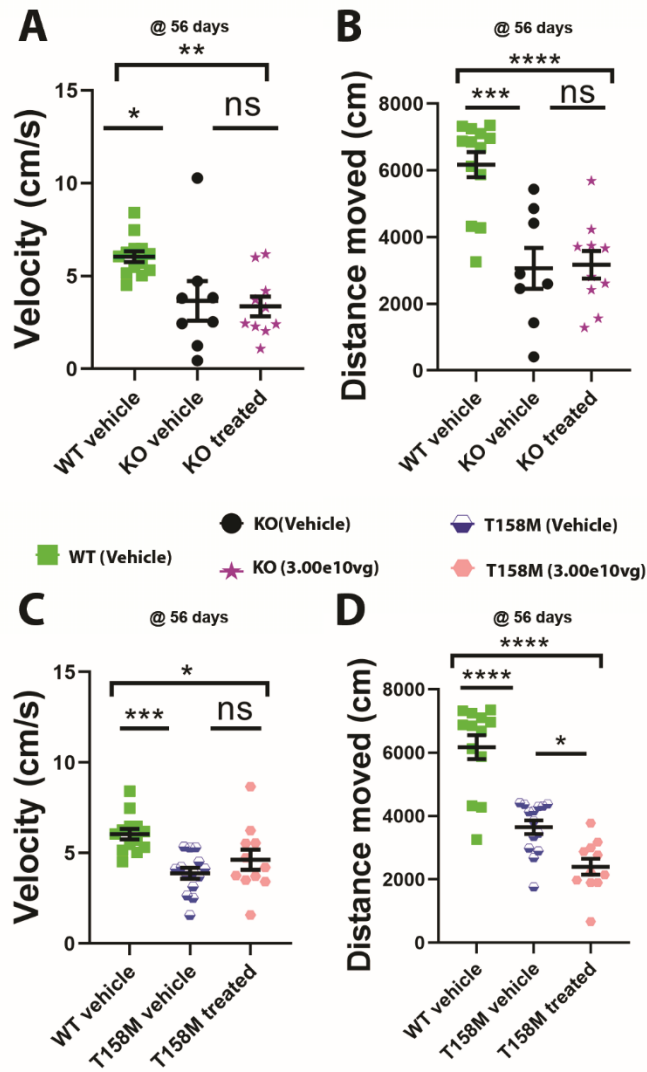

**Fig. S3: ICV Delivery of SCAAV9.P546.MECP2 Does not Improve Open Field Measures in KO and T158M Mice at 56 Days.** Open field performance is not ameliorated in vector treated KO and T158M mice at 56 days. (A) Vehicle treated WT mice had a significantly higher velocity than vehicle treated KO mice or vector treated KO mice (vehicle treated KO,  $p=0.0261$ ; vector treated KO,  $p=0.0068$ ) and there was no difference between vehicle treated KO mice and vector treated KO mice,  $p=0.9428$ . (B) Vehicle treated WT mice had a significantly higher distance than vehicle treated KO mice or vector treated KO mice (vehicle treated KO,  $p=0.0001$ ; vector treated KO,  $p<0.0001$ ) and there was no difference between vehicle treated KO and vector treated KO,  $p=0.9876$ . (C) Vehicle treated WT mice had a significantly higher velocity than vehicle treated T158M mice or vector treated T158M mice (vehicle treated T158M mice,  $p=0.0006$ ; vector treated T158M mice,  $p=0.0342$ ) and there was no difference between vehicle treated T158M and vector treated T158M mice,  $p=0.3613$ . (D) Vehicle treated WT mice had a significantly higher distance than vehicle treated T158M mice and vector treated T158M mice,  $p<0.0001$  for both comparisons, and there was a significant difference between vehicle treated T158M mice

and vector treated T158M mice,  $p=0.0141$ . Statistical significance was determined via ANOVA with Tukey's honest significance post hoc test. Values represent means  $\pm$  SEM, \* =  $p<0.05$ , \*\* =  $p<0.01$ , \*\*\* =  $p<0.001$ , \*\*\*\* =  $p<0.0001$ .

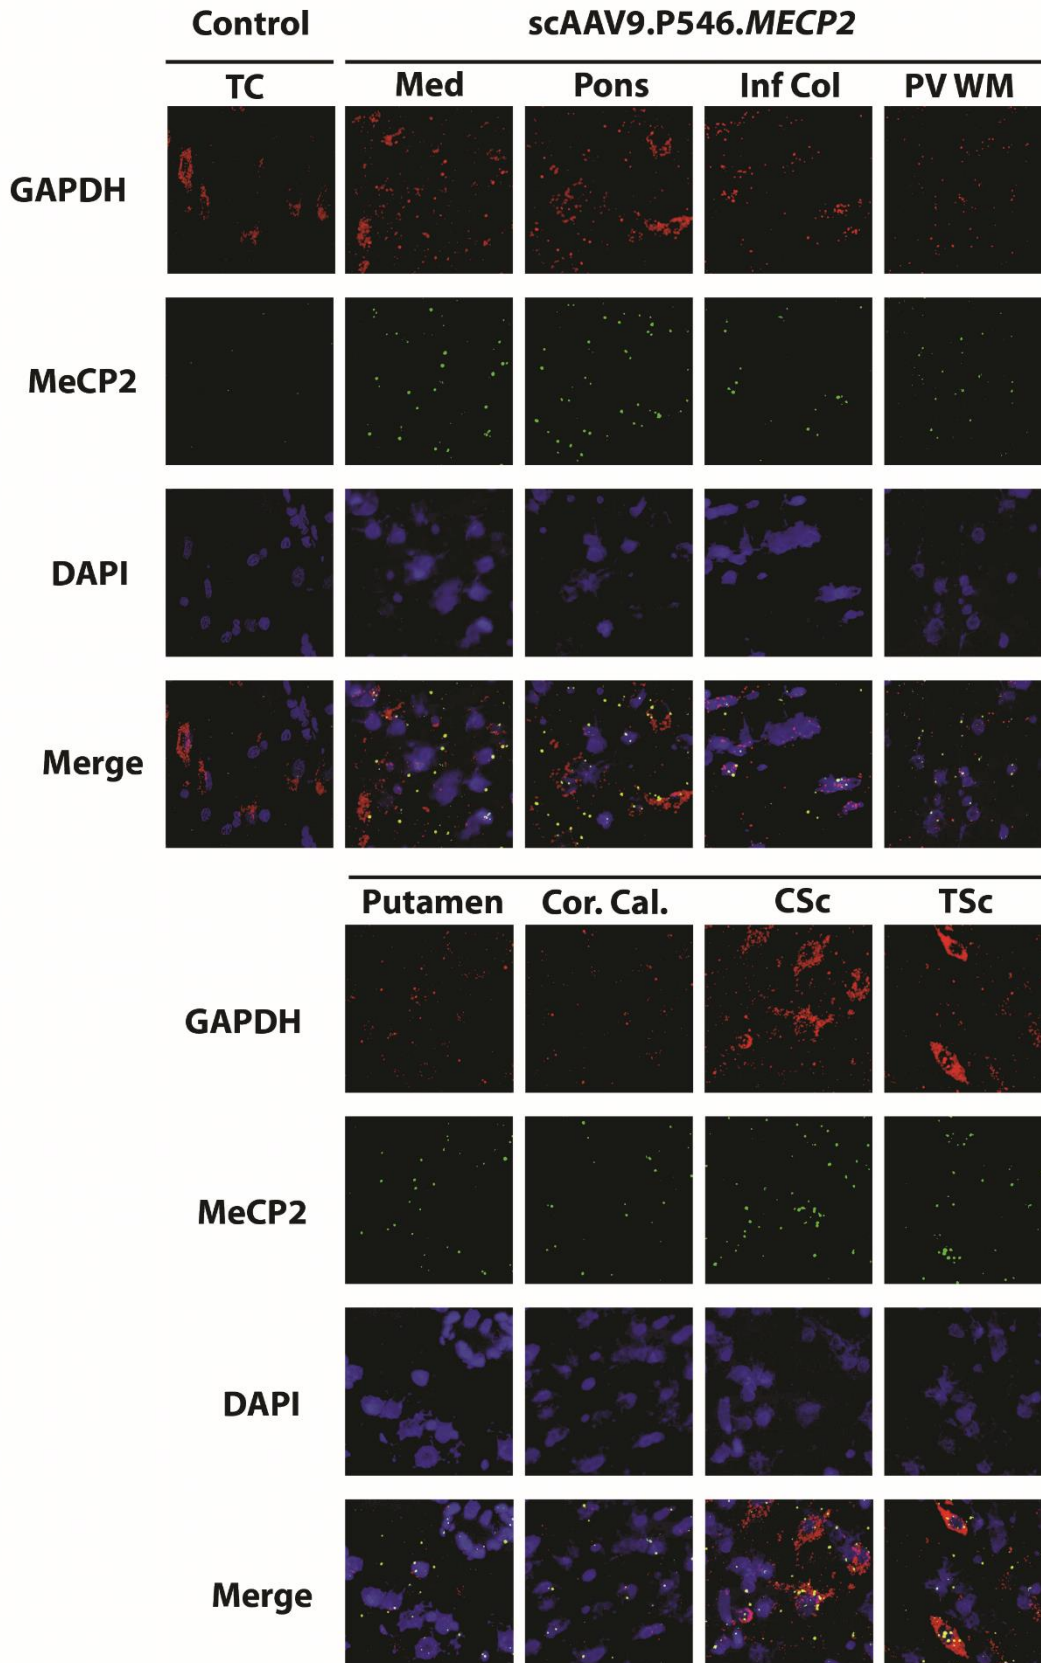

**Fig S4. *In Situ* Hybridization Analysis in Brain Tissue from Control and SCAAV9.P546.MECP2 Treated NHPs at 18 Months After a Single Intrathecal (IT) Dose of SCAAV9.P546.MECP2** *In situ* hybridization analysis shows vector-

derived RNA transcripts in additional key brain regions from brains of SCAAV9.P546. *MECP2*-treated WT animals but not untreated controls. The figure shows probes against *Gapdh* (red) and vector-derived human *MECP2* mRNA (green) along with nuclear labeling (Dapi, blue). TC = Temporal Cortex; Med = Medulla; Inf. Col. = Inferior Colliculus; PV. WM. = Periventricular White Matter; Cor. Cal. = Corpus Callosum; CSc = Cervical Spinal Cord, TSc = Thoracic Spinal Cord.



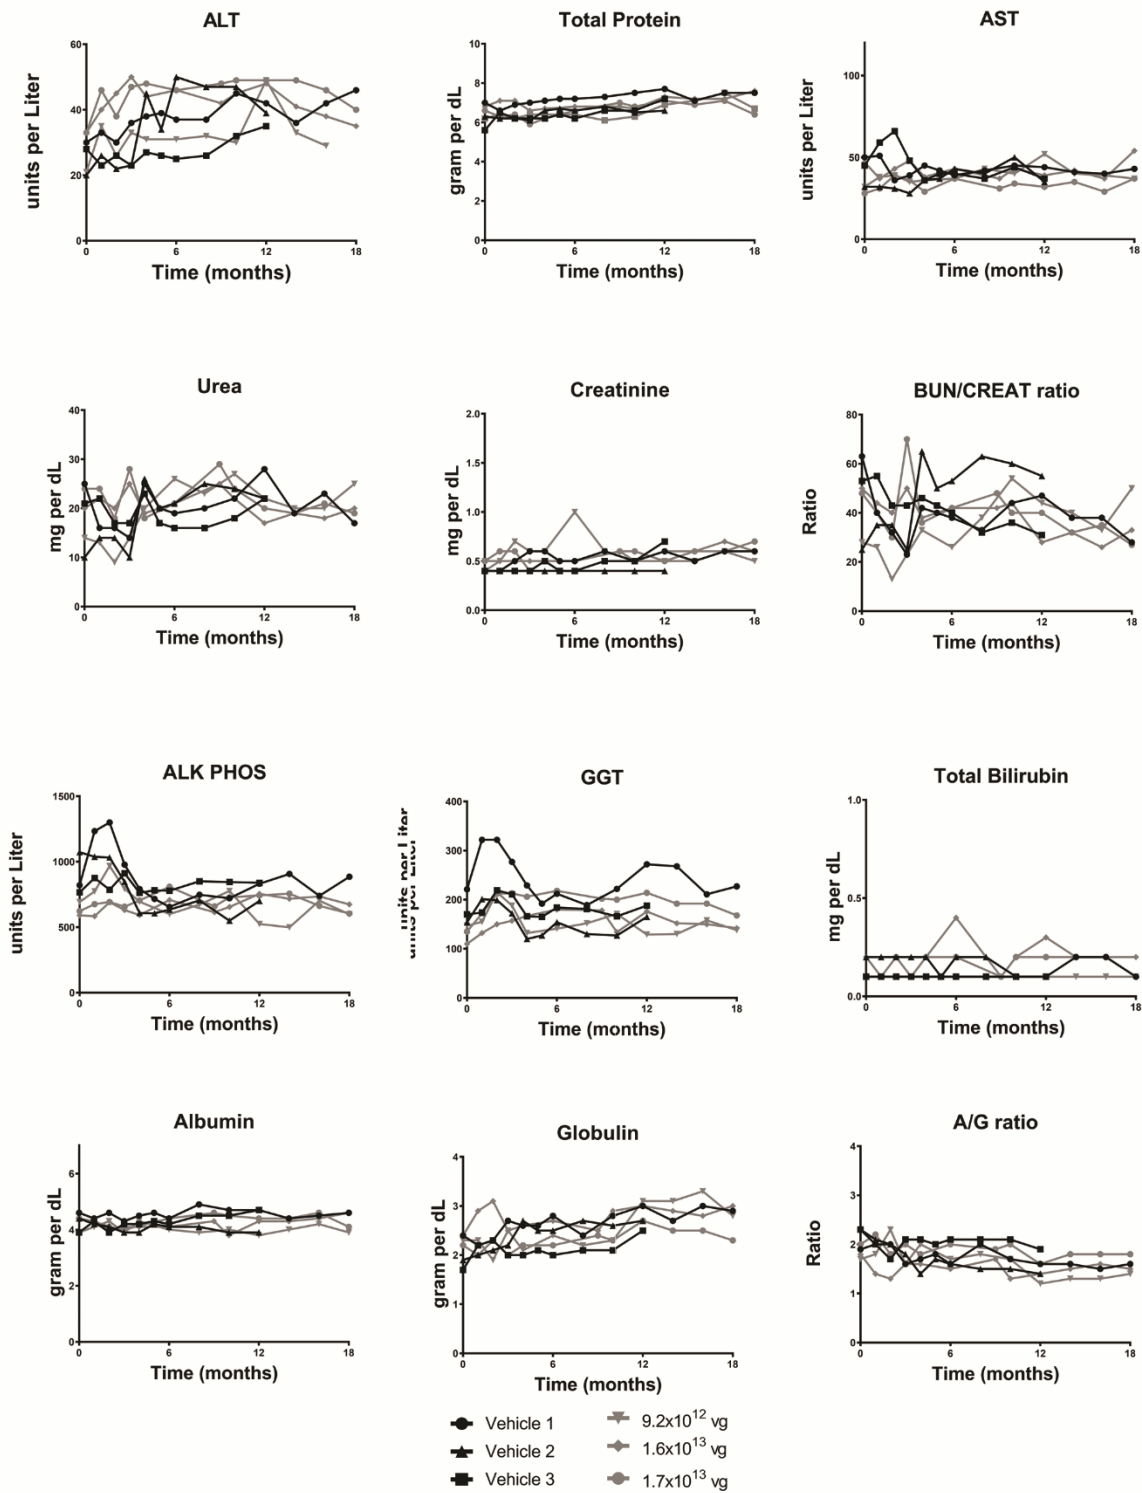

**Fig. S5: Serum Chemistries Following Intrathecal Delivery of scAAV9.P546.MECP2 in NHPS up to 18 Months Post Injection.** Serum chemistry values are graphed over 18 months post-injection: alanine (ALT), total protein, aspartate (AST), urea, creatinine, blood urea nitrogen/creatinine ratio (BUN/CREAT ratio), alkaline phosphatase activity (ALK PHOS), gamma-glutamyl transferase (GGT), total bilirubin, albumin, globulin, and albumin/globulin ratio (A/G ratio).

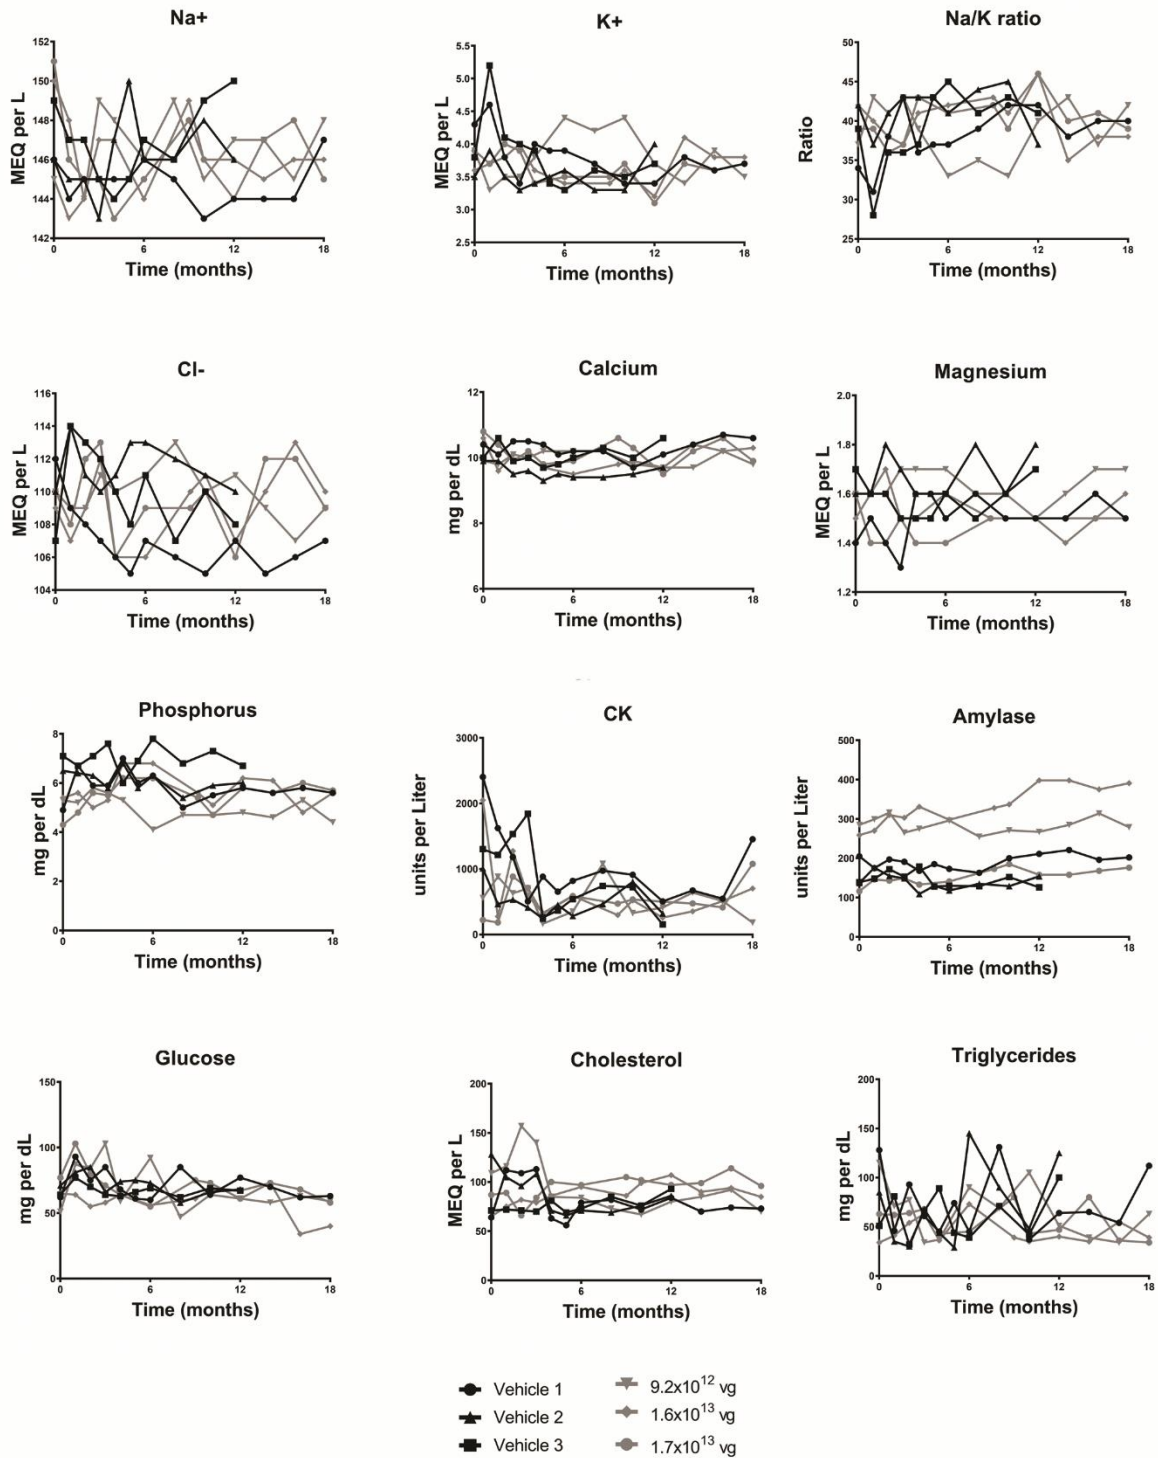

**Fig. S6: Serum Chemistries following Intrathecal Delivery of scAAV9.P546.MECP2 in NHPs up to 18 months Post Injection.** Blood serum chemistry is graphed over 18 months post injection: sodium (Na+), potassium (K+), sodium/potassium ratio (Na/K ratio), chloride (Cl-), calcium, magnesium, phosphorus, creatine kinase (CK), amylase, glucose, cholesterol, and triglycerides.

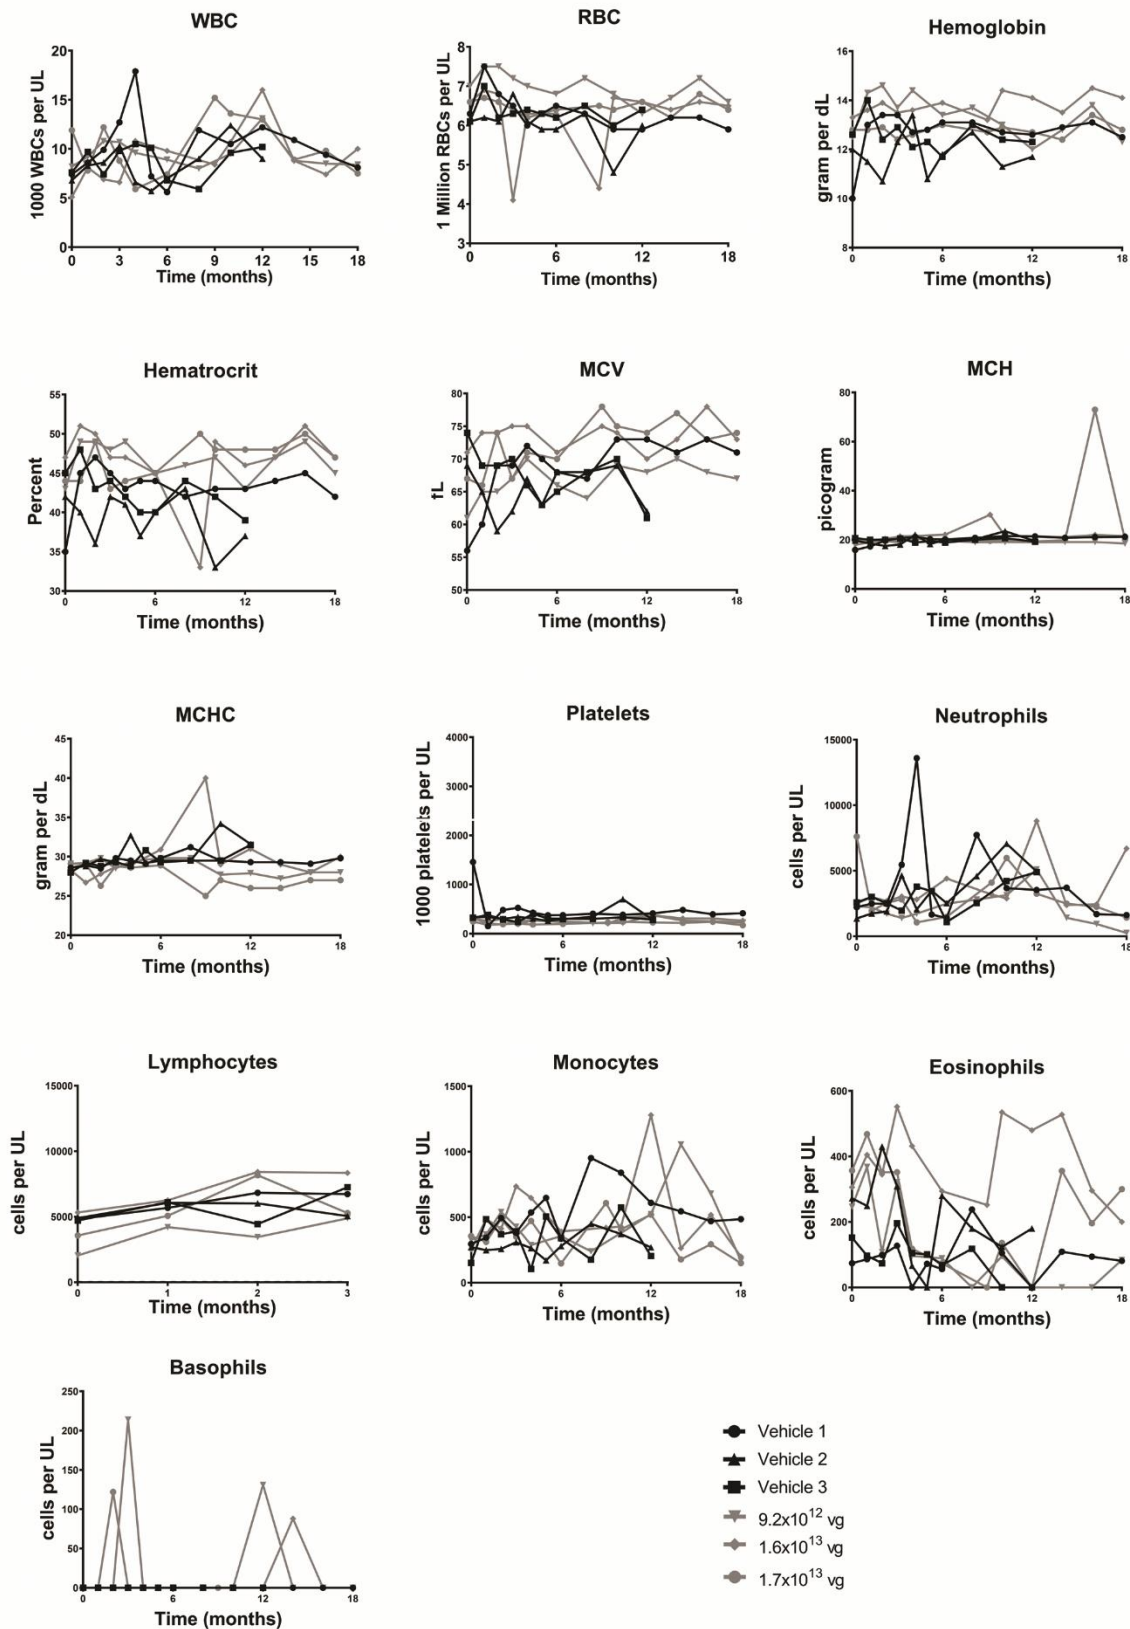

**Fig. S7: Hematology Following Intrathecal Delivery of scAAV9.P546. *MECP2* in NHPS up to 18 months Post Injection.** Hematology parameters are graphed over 18 months post injection: white blood cells (WBC), red blood cells (RBC), hemoglobin, hematocrit, mean corpuscular volume (MCV), mean corpuscular hemoglobin (MCH), mean

corpuscular hemoglobin concentration (MCHC), platelets, neutrophils, lymphocytes, monocytes, eosinophils, and basophils.

**Table S1: Vector Titer**

|                               | Silver Staining Titer |                                                   | ddPCR Titer          |                                                   |
|-------------------------------|-----------------------|---------------------------------------------------|----------------------|---------------------------------------------------|
| scAAV9.P546.MECP2 preparation | Viral Titer (vg/mL)   | Dose Range                                        | Viral Titer (vg/mL)  | Dose Range                                        |
| Mouse Preparation             | 1.5x10 <sup>13</sup>  | 1.5x10 <sup>9</sup> vg – 6.00x10 <sup>10</sup> vg | 1.2x10 <sup>13</sup> | 1.2x10 <sup>9</sup> vg – 4.00x10 <sup>10</sup> vg |
| NHP Preparation               | 1.1x10 <sup>13</sup>  | 9.2x10 <sup>12</sup> vg – 1.7x10 <sup>13</sup> vg | 2.1x10 <sup>13</sup> | 1.8x10 <sup>13</sup> vg – 3.2x10 <sup>13</sup> vg |

**Table S2: Aggregate Behavioral Score Untreated WT vs. Treated KO Comparison**

| Time point | Tukey's Honest Significance Test | Mean Diff. | 95.00% CI of diff. | Significance | Adjusted P Value |
|------------|----------------------------------|------------|--------------------|--------------|------------------|
| 60 Days    | WT Untreated vs. KO Untreated    | -3.228     | -3.879 to -2.577   | ****         | <0.0001          |
| 60 Days    | WT Untreated vs. KO 1.5e9vg      | -1.409     | -2.299 to -0.5193  | ****         | <0.0001          |
| 60 Days    | WT Untreated vs. KO 3.75e9vg     | -1.159     | -1.920 to -0.3983  | ****         | <0.0001          |
| 60 Days    | WT Untreated vs. KO 7.5e9vg      | -1.1       | -1.940 to -0.2590  | **           | 0.0011           |
| 60 Days    | WT Untreated vs. KO 1.5e10vg     | -0.8322    | -1.612 to -0.05226 | *            | 0.0242           |
| 60 Days    | WT Untreated vs. KO 3.0e10vg     | -1.455     | -2.281 to -0.6279  | ****         | <0.0001          |
| 60 Days    | WT Untreated vs. KO 6.0e10vg     | -1.359     | -2.215 to -0.5034  | ****         | <0.0001          |
| 90 Days    | WT Untreated vs. KO Untreated    | -4.088     | -5.007 to -3.170   | ****         | <0.0001          |
| 90 Days    | WT Untreated vs. KO 1.5e9vg      | -1.945     | -3.593 to -0.2974  | **           | 0.0062           |
| 90 Days    | WT Untreated vs. KO 3.75e9vg     | -1.792     | -2.498 to -1.086   | ****         | <0.0001          |
| 90 Days    | WT Untreated vs. KO 7.5e9vg      | -1.345     | -1.943 to -0.7477  | ****         | <0.0001          |
| 90 Days    | WT Untreated vs. KO 1.5e10vg     | -1.036     | -1.614 to -0.4588  | ****         | <0.0001          |
| 90 Days    | WT Untreated vs. KO 3.0e10vg     | -1.89      | -2.512 to -1.268   | ****         | <0.0001          |
| 90 Days    | WT Untreated vs. KO 6.0e10vg     | -2.279     | -3.008 to -1.549   | ****         | <0.0001          |

**Table S3: Non-human Primate Injection Parameters**

| Material Injected | Animal ID | Age at Injection | IT Infusion Date | Bodyweight at Infusion (kg) | Viral Dose (vg)      | Omnipaque™ |
|-------------------|-----------|------------------|------------------|-----------------------------|----------------------|------------|
| scAAV9.P546.MECP2 | 15C38     | 12 Months        | 04/06/2016       | 1.68                        | 1.7x10 <sup>13</sup> | 0.4mL      |
| scAAV9.P546.MECP2 | 15C49     | 12 Months        | 04/06/2016       | 1.30                        | 1.3x10 <sup>13</sup> | 0.4mL      |
| scAAV9.P546.MECP2 | 15C40     | 12 months        | 04/06/2016       | 1.79                        | 1.6x10 <sup>13</sup> | 0.4mL      |
| scAAV9.P546.MECP2 | 15C48     | 12 months        | 04/06/2016       | 1.83                        | 1.7x10 <sup>13</sup> | 0.4mL      |
| scAAV9.P546.MECP2 | 15C34     | 6 months         | 10/23/2019       | 1.23                        | 9.2x10 <sup>12</sup> | 0.4mL      |
